# Supplementary material
Source: publisher site journal article supplement (https://www.dovepress.com/article/215895)
Supplement: Supplementary file 1 [file get_supplementary_file.php]

**Supporting Information**

**Glucoside derivatives of podophyllotoxin: Synthesis, physicochemical properties, and cytotoxicity**

Cheng-Ting Zi1,2,a, Liu Yang2,a, Qing-Hua Kong2, Hong-Mei Li2, Xing-Zhi Yang2, Zhong-Tao Ding3, Zi-Hua Jiang4,*, Jiang-Miao Hu2,*, Jun Zhou2

1 Key Laboratory of Pu-er Tea Science, Ministry of Education, College of Science, Yunnan Agricultural University, Kunming, 650201, China

2 State Key Laboratory of Phytochemistry and Plant Resources in West China, Kunming Institute of Botany, Chinese Academy of Sciences, Kunming 650201, China

3 Key Laboratory of Medicinal Chemistry for Nature Resource, Ministry of Education, School of Chemical Science and Technology, Yunnan University, Kunming 650091, China

4 Department of Chemistry, Lakehead University, 955 Oliver Road, Thunder Bay, ON P7B 5E1, Canada

a These authors contributed equally to this work

Correspondence:

Zi-Hua Jiang

Department of Chemistry, Lakehead University, 955 Oliver Road, Thunder Bay, ON P7B 5EI, Canada

Tel +1 807 766 7171

Fax +1 807 346 7775

Email [zjiand@lakeheadu.cn](mailto:zjiand@lakeheadu.cn)

Jiang-Miao Hu

State Key Laboratory of Phytochemistry and Plant Resources in West China, Kunming Institute of Botany, Chinese Academy of Sciences, Kunming 650201, China

Tel +86 871 6522 3264

Fax +86 871 6522 3261

Email [hujiangmiao@mail.kib.ac.cn](mailto:hujiangmiao@mail.kib.ac.cn)

***1.*** ***Chemical structures of podophyllotoxin derivatives***

**Table S1** Chemical structures of podophyllotoxin derivatives **6a** – **6f**.

|  | | |
| --- | --- | --- |
| **Compd.** | R1 | R |
| **6a** | Ac | CH3 |
| **6b** | Ac | H |
| **6c** | H | CH3 |
| **6d** | H | H |
| **6e** | PrC | CH3 |
| **6f** | PrC | H |

***2. Octanol-water partition coefficient***

The octanol-water partition coefficient of etoposide (**2**) and compound **6b** by using the previous reported.1-3 Etoposide was dissolved in method to obtained 1 mg/mL stock solutions, and then 40, 20, 10, and 5 μg/mL were achieved. Under the chromatography conditions (HPLC was performed on an Agilent 1260 liquid chromatography with an XTerra RP18 (4.6 × 250 mm) column; the detecting wavelength was 254 nm; the flow rate was 1mL/min.), the injecting volume was 2 *µ*L (*V*), respectively, leading to the determination of a peak area (*A*). The relationship of the concentration (*C*) and the peak area (*A*) was described by the equation of linear regression: *Co* = 0.126*Ao* – 0.012, *R2* = 0.999. Then, etoposide was dissolved in octanol to get 1 mg/mL stock solutions, was added into 10 mL screw-capped tubes, 1 mL of water was added. After shaken and centrifugated, 500 μL etoposide-octanol solutions were obtained to volumetric flasks diluted in methanol to get 10 mL etoposide-method solutions. Under the HPLC conditions, the injecting volume was 5 µL (*Vo*), determinated peak area (*Ao*). The log *P* value was calculated by means of the following expression: log*Co*/(*C* – *Co*), *Co* = *V*/*Vo* × (0.149*Ao* – 0.342) × 20, *C*= 1 mg/mL, and the log*P* of octanol-water of compound **6b** (the detecting wavelength was 254 nm) was evaluated form the formulas: log*Co*/(*C* – *Co*), *Co* = *V*/*Vo* × (0.126*Ao* – 0.784) × 20, *C*= 1 mg/mL.

***3. Solubility***

The calibration curve of absorbance vs concentration is drawn to estimate the concentration of podophyllotoxin in the solutions using podophyllotoxin solutions in the appropriate concentration range in method. According to Beer-Lambert’s law, the value of molar absorbance coefficient (*ε*) of drug at the wavelength of maximum absorbance (*λ*max = 275.5 nm for podophyllotoxin) is determined from the slope of the standard curves. Then, the experimental procedure for measuring the solubility of podophyllotoxin (**1**) and compound **6b** in water as follows: first an excess amount of each drug is added to a centrifuge tube (1.5 mL) containing approximately 1 mL of water. The solution is fully agitated by shaking and centrifugating at constant temperature 25 oC for at least 24 h to ensure that saturation is achieved. After this period, the solution is kept still for 2 h and centrifuged, and then filtered through a 0.45 μm Millipore filter. The solvent was evaporated under reduced pressure, the residue was dissolved in 1 mL method to obtain the diluted solutions. Finally, the absorbance of appropriate diluted samples is measured using a UV-vis spectrophotometer. All the solubility experiments are repeated at least three times to obtain mean values.1

1. Jabbari M, Teymoori F. An insight into effect of micelle-forming surfactants on aqueous solubilization and octanol/water partition coefficient of the drugs gemfibrozil and ibuprofen. *J Mol Liq.* 2018; 262: 1–7.
